# Supplementary material
Source: MDPI journal article supplement (https://www.mdpi.com/2073-4395/11/6/1204)
Supplement: s1 [file s1 › agronomy-1212644-supplementary.pdf]

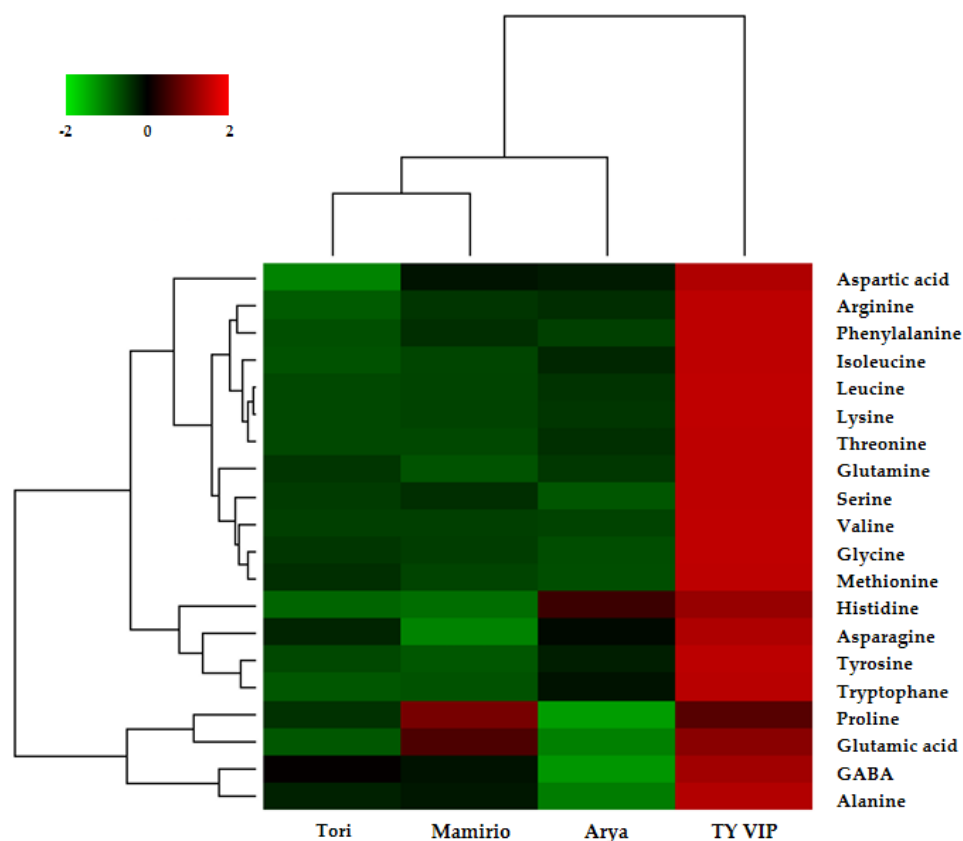

**Figure S1.** Heat map of the amino acids in ‘Arya’, ‘Tori’, ‘Mamirio’, and ‘TY VIP’ tomato cultivars. Three replicates were analyzed using three fruit for each replicate. The data were standardized for heat map.

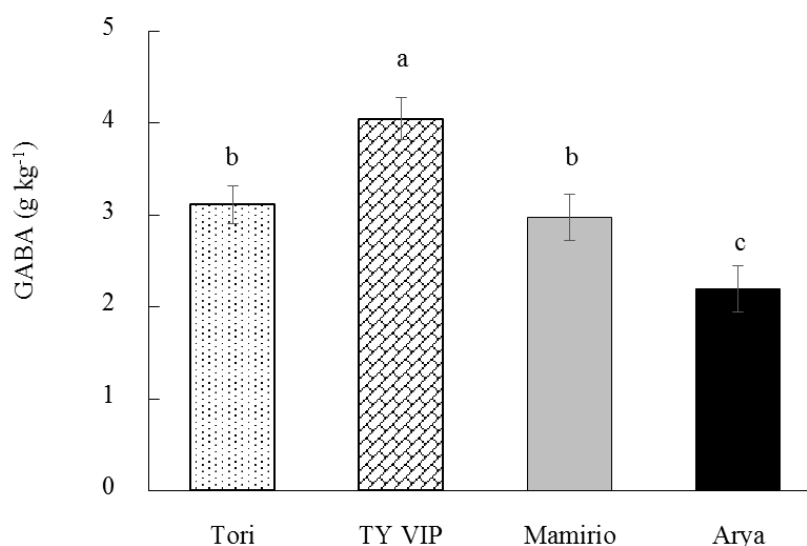

**Figure S2.** GABA content of ‘Tori’, ‘TY VIP’, ‘Mamirio’, and ‘Arya’ tomato cultivars at commercial pink ripening stage. The bars with different letters indicate a significant difference ( $p < 0.05$ ) between cultivars. The vertical bars represent the standard error of the means ( $n=3$ ).
